# Supplementary material for: Ultraviolet B (UVB) Photosensitivities of Tea Catechins and the Relevant Chemical Conversions
Source: MDPI journal article supplement (doi:10.3390/molecules21101345), 2016-10-10
Supplement: s1 [file s1]

## Supplementary Materials: Ultraviolet B (UVB) Photosensitivities of Tea Catechins and the Relevant Chemical Conversions

Meng Shi, Ying Nie, Xin-Qiang Zheng, Jian-Liang Lu, Yue-Rong Liang and Jian-Hui Ye

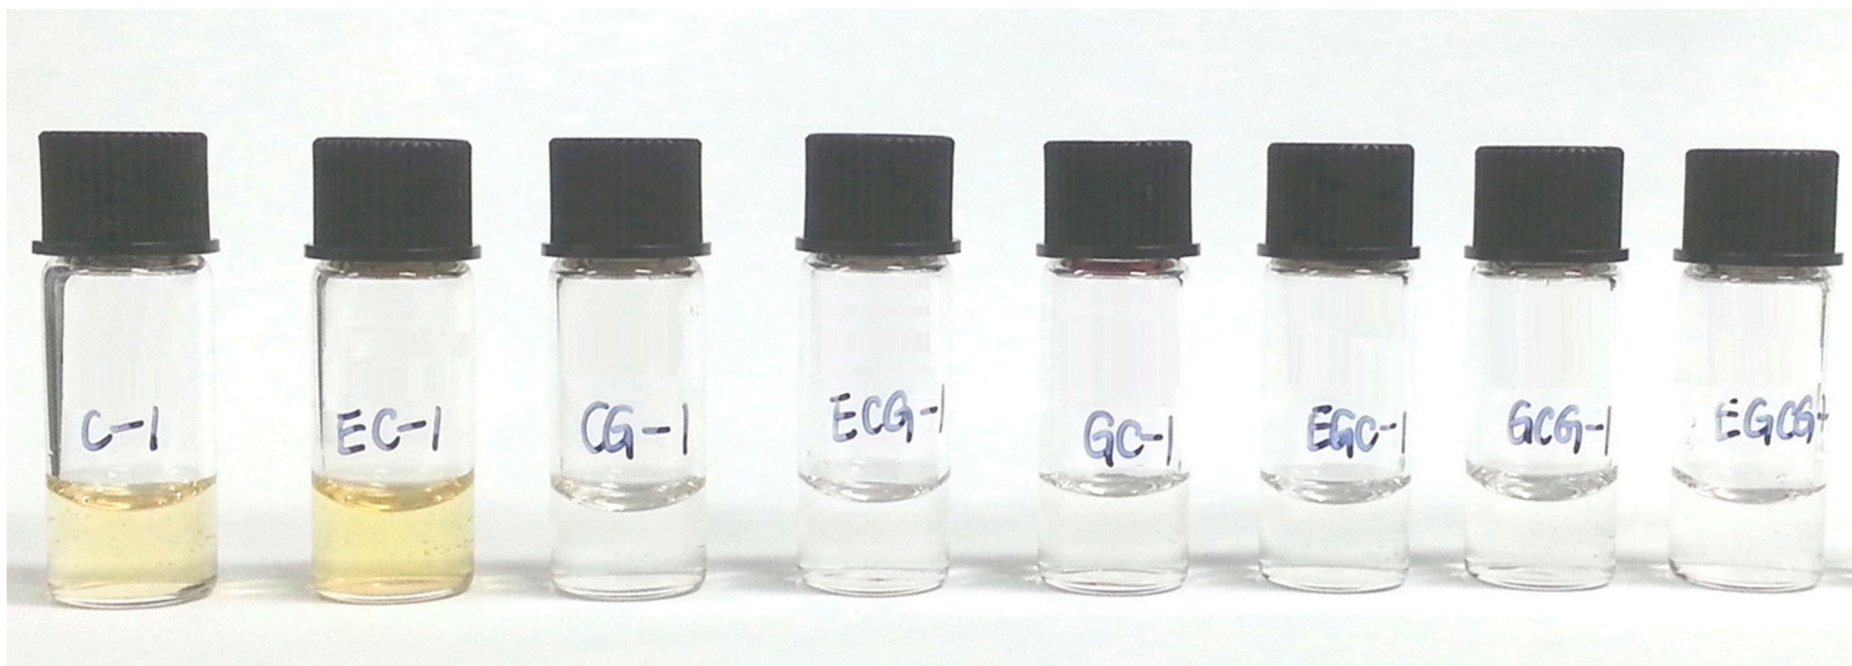

**Figure S1.** The picture of aqueous solutions of 8 catechins (575  $\mu\text{M}$ ) after 15-day-storage under laboratory illumination at 25 °C.
